# Supplementary material for: Evaluation of Nutraceutical Properties of Eleven Microalgal Strains Isolated from Different Freshwater Aquatic Environments: Perspectives for Their Application as Nutraceuticals
Source: MDPI journal article supplement (doi:10.3390/foods11050654), 2022-02-23
Supplement: s1 [file s1]

## Supplementary materials

**Table S1.** The dry biomass weight (yield) of 15 ml of each fresh microalgal culture.

| Yield (g) | F1    | F2    | F3    | F4    | R1    | SEC_Li_ChL_1 | CL_Sc | CL_Ch  | Idr   | FB     | C2    |
|-----------|-------|-------|-------|-------|-------|--------------|-------|--------|-------|--------|-------|
| Acetone   | 0.018 | 0.015 | 0.007 | 0.018 | 0.022 | 0.046        | 0.012 | 0.0121 | 0.017 | 0.0027 | 0.016 |
| Methanol  | 0.021 | 0.001 | 0.017 | 0.009 | 0.016 | 0.009        | 0.008 | 0.0117 | 0.008 | 0.0139 | 0.006 |
| Ethanol   | 0.027 | 0.006 | 0.023 | 0.009 | 0.012 | 0.013        | 0.010 | 0.0115 | 0.010 | 0.0145 | 0.007 |
| Water     | 0.013 | 0.002 | 0.004 | 0.020 | 0.012 | 0.012        | 0.034 | 0.0132 | 0.005 | 0.022  | 0.008 |

**Table S2.** Total chlorophyll content of dry and fresh microalgal strains, under different types of solvent extraction, expressed as  $\mu\text{g ml}^{-1}$  of fresh culture volume. Each datum is the mean  $\pm$  SD from three replicates.

| Total Chlorophyll |              | F1                            | F2                            | F3                            | F4                            | R1                            | C2                            | SEC_Li_ChL_1                  | CL_Sc                         | CL_Ch                         | Idr                           | FB                            |
|-------------------|--------------|-------------------------------|-------------------------------|-------------------------------|-------------------------------|-------------------------------|-------------------------------|-------------------------------|-------------------------------|-------------------------------|-------------------------------|-------------------------------|
| Acetone           | <i>Dry</i>   | $0.24 \pm 1.7 \times 10^{-4}$ | $0.12 \pm 1.0 \times 10^{-3}$ | $0.35 \pm 3.2 \times 10^{-5}$ | $0.1 \pm 9.8 \times 10^{-5}$  | $0.26 \pm 3.0 \times 10^{-4}$ | $0.09 \pm 5.5 \times 10^{-5}$ | $0.24 \pm 4.5 \times 10^{-5}$ | $0.10 \pm 4.0 \times 10^{-5}$ | $0.09 \pm 5.0 \times 10^{-5}$ | $0.31 \pm 2.1 \times 10^{-5}$ | $0.21 \pm 1.2 \times 10^{-4}$ |
|                   | <i>Fresh</i> | $0.83 \pm 1.4 \times 10^{-3}$ | $2.68 \pm 2.2 \times 10^{-4}$ | $2.66 \pm 4.1 \times 10^{-4}$ | $1.78 \pm 6.8 \times 10^{-5}$ | $1.64 \pm 9.2 \times 10^{-4}$ | $1.23 \pm 9.8 \times 10^{-5}$ | $1.07 \pm 3.6 \times 10^{-4}$ | $0.61 \pm 1.8 \times 10^{-4}$ | $0.82 \pm 1.6 \times 10^{-4}$ | $1.37 \pm 1.1 \times 10^{-4}$ | $1.03 \pm 2.7 \times 10^{-4}$ |
| Methanol          | <i>Dry</i>   | $1.03 \pm 3.5 \times 10^{-4}$ | $0.36 \pm 1.4 \times 10^{-4}$ | $0.68 \pm 1.4 \times 10^{-3}$ | $1.01 \pm 1.2 \times 10^{-5}$ | $1.11 \pm 7.9 \times 10^{-5}$ | $1.11 \pm 1.0 \times 10^{-4}$ | $0.74 \pm 1.6 \times 10^{-4}$ | $0.48 \pm 3.9 \times 10^{-5}$ | $1.16 \pm 2.8 \times 10^{-4}$ | $0.42 \pm 1.1 \times 10^{-5}$ | $1.12 \pm 4.8 \times 10^{-4}$ |
|                   | <i>Fresh</i> | $2.75 \pm 7.9 \times 10^{-4}$ | $1.76 \pm 2.6 \times 10^{-4}$ | $3.84 \pm 2.1 \times 10^{-3}$ | $1.82 \pm 1.9 \times 10^{-4}$ | $1.42 \pm 7.0 \times 10^{-4}$ | $2.13 \pm 3.1 \times 10^{-5}$ | $1.87 \pm 3.1 \times 10^{-5}$ | $0.85 \pm 1.0 \times 10^{-4}$ | $1.13 \pm 2.0 \times 10^{-4}$ | $1.88 \pm 1.3 \times 10^{-3}$ | $1.60 \pm 1.5 \times 10^{-4}$ |
| Ethanol           | <i>Dry</i>   | $0.40 \pm 3.8 \times 10^{-4}$ | $0.31 \pm 2.6 \times 10^{-5}$ | $0.44 \pm 2.6 \times 10^{-5}$ | $0.22 \pm 1.6 \times 10^{-4}$ | $0.3 \pm 4.1 \times 10^{-5}$  | $0.13 \pm 2.8 \times 10^{-5}$ | $0.28 \pm 2.8 \times 10^{-5}$ | $0.14 \pm 6.1 \times 10^{-6}$ | $0.09 \pm 1.5 \times 10^{-4}$ | $0.16 \pm 3.5 \times 10^{-5}$ | $0.16 \pm 2.4 \times 10^{-4}$ |
|                   | <i>Fresh</i> | $3.01 \pm 3.0 \times 10^{-4}$ | $2.33 \pm 1.0 \times 10^{-4}$ | $3.94 \pm 1.5 \times 10^{-3}$ | $1.51 \pm 2.0 \times 10^{-4}$ | $1.99 \pm 2.3 \times 10^{-4}$ | $1.54 \pm 7.8 \times 10^{-5}$ | $1.71 \pm 1.7 \times 10^{-4}$ | $0.88 \pm 2.0 \times 10^{-4}$ | $1.12 \pm 3.3 \times 10^{-4}$ | $1.86 \pm 1.9 \times 10^{-4}$ | $1.29 \pm 2.0 \times 10^{-5}$ |

**Table S3.** Carotenoids content of dry and fresh microalgal strains, under different types of solvent extraction, expressed as  $\mu\text{g ml}^{-1}$  of fresh culture volume. Each datum is the mean  $\pm$  SD from three replicates.

| Carotenoids |              | F1                            | F2                            | F3                             | F4                            | R1                            | C2                             | SEC_Li_ChL_1                  | CL_Sc                         | CL_Ch                         | Idr                           | FB                            |
|-------------|--------------|-------------------------------|-------------------------------|--------------------------------|-------------------------------|-------------------------------|--------------------------------|-------------------------------|-------------------------------|-------------------------------|-------------------------------|-------------------------------|
| Acetone     | <i>Dry</i>   | $0.04 \pm 7.1 \times 10^{-5}$ | $0.02 \pm 2.7 \times 10^{-4}$ | $0.04 \pm 1.8 \times 10^{-5}$  | $0.02 \pm 2.3 \times 10^{-5}$ | $0.06 \pm 1.6 \times 10^{-4}$ | $0.03 \pm 7.55 \times 10^{-5}$ | $0.07 \pm 1.5 \times 10^{-5}$ | $0.04 \pm 1.5 \times 10^{-5}$ | $0.03 \pm 7.1 \times 10^{-6}$ | $0.08 \pm 2.7 \times 10^{-4}$ | $0.06 \pm 9.2 \times 10^{-5}$ |
|             | <i>Fresh</i> | $0.20 \pm 6.9 \times 10^{-4}$ | $0.07 \pm 4.4 \times 10^{-4}$ | $0.08 \pm 3.3 \times 10^{-4}$  | $0.29 \pm 4.3 \times 10^{-5}$ | $0.32 \pm 5.8 \times 10^{-4}$ | $0.12 \pm 2.31 \times 10^{-5}$ | $0.28 \pm 6.7 \times 10^{-5}$ | $0.2 \pm 4.9 \times 10^{-5}$  | $0.23 \pm 7.6 \times 10^{-5}$ | $0.31 \pm 2.2 \times 10^{-4}$ | $0.29 \pm 3.0 \times 10^{-5}$ |
| Methanol    | <i>Dry</i>   | >0.2                          | $0.01 \pm 3.0 \times 10^{-5}$ | $0.002 \pm 8.1 \times 10^{-4}$ | >0.2                          | >0.2                          | >0.2                           | $0.04 \pm 3.0 \times 10^{-4}$ | $0.13 \pm 1.0 \times 10^{-4}$ | >0.2                          | $0.16 \pm 1.5 \times 10^{-4}$ | >0.2                          |
|             | <i>Fresh</i> | $0.05 \pm 7.7 \times 10^{-4}$ | $0.24 \pm 4.6 \times 10^{-4}$ | >0.4                           | $0.36 \pm 5.4 \times 10^{-4}$ | $0.20 \pm 5.0 \times 10^{-4}$ | $0.16 \pm 5.63 \times 10^{-4}$ | $0.35 \pm 5.8 \times 10^{-4}$ | $0.24 \pm 6.0 \times 10^{-5}$ | $0.31 \pm 2.1 \times 10^{-3}$ | $0.29 \pm 4.8 \times 10^{-4}$ | $0.35 \pm 7.7 \times 10^{-4}$ |
| Ethanol     | <i>Dry</i>   | $0.12 \pm 2.1 \times 10^{-4}$ | $0.05 \pm 2.3 \times 10^{-5}$ | $0.07 \pm 3.8 \times 10^{-5}$  | $0.06 \pm 9.5 \times 10^{-5}$ | $0.5 \pm 8.0 \times 10^{-5}$  | $0.03 \pm 1.09 \times 10^{-4}$ | $0.08 \pm 2.2 \times 10^{-5}$ | $0.05 \pm 4.2 \times 10^{-6}$ | $0.03 \pm 1.9 \times 10^{-5}$ | $0.05 \pm 6.1 \times 10^{-5}$ | $0.06 \pm 1.0 \times 10^{-5}$ |
|             | <i>Fresh</i> | >0.4                          | $0.19 \pm 4.3 \times 10^{-4}$ | >0.4                           | $0.38 \pm 2.6 \times 10^{-4}$ | $0.34 \pm 1.2 \times 10^{-4}$ | $0.38 \pm 3.73 \times 10^{-4}$ | $0.31 \pm 3.3 \times 10^{-4}$ | $0.20 \pm 5.6 \times 10^{-5}$ | $0.25 \pm 6.9 \times 10^{-5}$ | $0.27 \pm 2.7 \times 10^{-4}$ | $0.28 \pm 8.0 \times 10^{-5}$ |

**Table S4.** Total polyphenols content of dry and fresh microalgal strains, under different types of solvent extraction, expressed as mg GAE g<sup>-1</sup> dw. Fresh microalgal results were calculated based on the yield listed in Table S1. Each datum is the mean ± SD from three replicates.

| Total polyphenols |              | F1                        | F2                        | F3                        | F4                        | R1                        | SEC_Li_ChL_1              | CL_Sc                     | CL_Ch     | Idr       | FB        | C2        |
|-------------------|--------------|---------------------------|---------------------------|---------------------------|---------------------------|---------------------------|---------------------------|---------------------------|-----------|-----------|-----------|-----------|
| Acetone           | <i>Dry</i>   | 0.20±0.06                 | 2.61±0.01                 | 2.81±0.42                 | 0.08±1 × 10 <sup>-3</sup> | 1.68±0.11                 | 1.20±0.20                 | 0.14±0.05                 | 1.67±0.12 | 3.22±0.51 | 3.45±0.38 | 6.04±0.21 |
|                   | <i>Fresh</i> | 0.18±0.01                 | 1.41±0.02                 | 2.50±0.46                 | 0.63±0.15                 | 0.13±0.05                 | 0.37±0.01                 | 0.67±0.05                 | 1.18±0.08 | 0.82±0.07 | 3.01±0.43 | 0.61±0.01 |
| Methanol          | <i>Dry</i>   | 4.08±0.11                 | 2.01±4 × 10 <sup>-3</sup> | 3.30±0.01                 | 2.51±0.03                 | 4.13±0.08                 | 2.80±0.23                 | 2.17±0.15                 | 5.88±0.07 | 2.21±0.25 | 4.05±0.10 | 6.41±0.62 |
|                   | <i>Fresh</i> | 0.66±4 × 10 <sup>-3</sup> | 4.85±1.12                 | 1.83±0.25                 | 0.63±0.05                 | 0.43±0.12                 | 1.06±0.01                 | 0.59±0.07                 | 1.68±0.11 | 1.18±0.08 | 1.37±0.11 | 1.66±0.07 |
| Ethanol           | <i>Dry</i>   | 1.29±0.24                 | 1.92±0.05                 | 2.32±0.20                 | 0.99±0.29                 | 0.74±0.09                 | 0.24±2 × 10 <sup>-3</sup> | 1.34±0.27                 | 6.78±1.51 | 0.55±0.07 | 3.84±0.99 | 0.76±0.39 |
|                   | <i>Fresh</i> | 0.81±0.03                 | 1.23±0.21                 | 2.08±0.06                 | 0.26±0.10                 | 0.20±1 × 10 <sup>-3</sup> | 0.20±0.06                 | 0.56±0.02                 | 1.39±0.04 | 0.31±0.08 | 0.81±0.07 | 1.27±0.16 |
| Water             | <i>Dry</i>   | 0.42±0.01                 | 1.80±0.12                 | 0.02±4 × 10 <sup>-3</sup> | 2.27±0.01                 | 2.72±0.16                 | 3.65±0.05                 | 2.27±0.07                 | 0.96±0.05 | 1.11±0.09 | 3.80±0.08 | 1.52±0.05 |
|                   | <i>Fresh</i> | n.d.                      | n.d.                      | n.d.                      | 0.08±0.01                 | n.d.                      | 0.03±0.02                 | 0.02±2 × 10 <sup>-3</sup> | n.d.      | 0.15±0.01 | n.d.      | n.d.      |

n.d. not detected

**Table S5.** Total flavonoids content of dry and fresh microalgal strains, under different types of solvent extraction, expressed as mg QE g<sup>-1</sup> dw. Fresh microalgal results were calculated based on the yield listed in Table S1. Each datum is the mean ± SD from three replicates.

| Total flavonoids |              | F1         | F2         | F3         | F4         | R1          | SEC_Li_ChL_1 | CL_Sc      | CL_Ch       | Idr        | FB         | C2          |
|------------------|--------------|------------|------------|------------|------------|-------------|--------------|------------|-------------|------------|------------|-------------|
| Acetone          | <i>Dry</i>   | 19.98±0.28 | 15.11±5.93 | 38.37±8.12 | 45.04±0.04 | 88.09±13.91 | 20.77±3.31   | 6.88±1.98  | 28.61±1.37  | 60.61±4.57 | 34.94±0.73 | 89.06±5.01  |
|                  | <i>Fresh</i> | 2.46±0.01  | 27.38±1.13 | 58.32±2.72 | 12.73±0.05 | 2.89±0.09   | 3.55±0.06    | 5.70±1.36  | 86.43±7.98  | 8.86±0.55  | 9.81±0.50  | 13.78±0.64  |
| Methanol         | <i>Dry</i>   | 83.71±3.69 | 38.81±2.08 | 74.60±2.32 | 95.33±0.98 | 128.90±3.82 | 49.07±1.25   | 36.39±2.51 | 118.20±3.99 | 27.27±0.10 | 55.36±0.49 | 106.51±2.64 |
|                  | <i>Fresh</i> | 16.95±0.31 | 11.88±1.83 | 53.02±1.14 | 21.35±2.41 | 13.18±1.17  | 23.23±1.53   | 11.45±0.63 | 27.70±0.65  | 24.33±1.42 | 38.02±2.72 | 57.62±1.25  |
| Ethanol          | <i>Dry</i>   | 24.72±0.45 | 34.97±0.53 | 49.19±2.85 | 14.38±0.64 | 16.83±1.56  | 10.02±1.37   | 5.20±1.36  | 19.32±0.35  | 4.30±0.49  | 9.80±0.04  | 35.06±3.15  |
|                  | <i>Fresh</i> | 16.59±0.34 | 29.22±2.18 | 51.24±1.52 | 16.57±1.52 | 16.18±1.57  | 12.25±0.40   | 7.01±0.20  | 23.44±0.99  | 16.96±0.71 | 29.49±0.30 | 37.92±0.18  |
| Water            | <i>Dry</i>   | n.d.       | 3.22±0.68  | n.d.       | 0.45±0.19  | 1.58±0.63   | 5.93±0.20    | 9.92±0.25  | 0.29±0.06   | 1.78±0.50  | 2.42±0.40  | 25.76±2.61  |
|                  | <i>Fresh</i> | n.d.       | n.d.       | n.d.       | n.d.       | n.d.        | n.d.         | n.d.       | n.d.        | n.d.       | n.d.       | 15.06±0.92  |

n.d. not detected

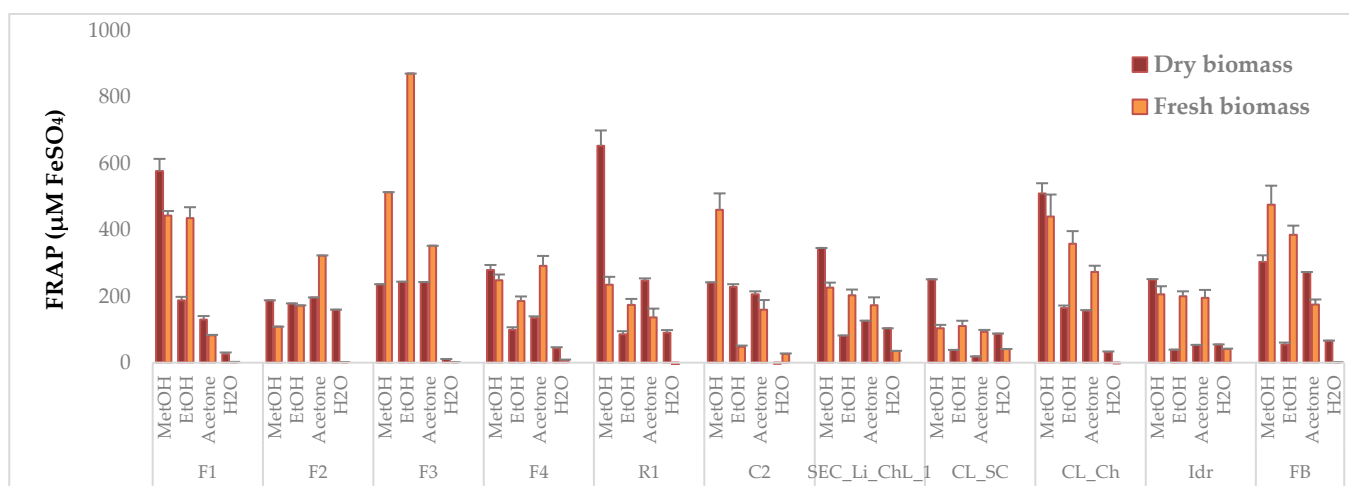

**Figure S1.** FRAP activity, expressed as  $\mu\text{M FeSO}_4$ , of 85  $\mu\text{L}$  extract of dry and fresh microalgal biomass under different types of solvent extraction. Each datum is the mean  $\pm$  SD from three replicates.

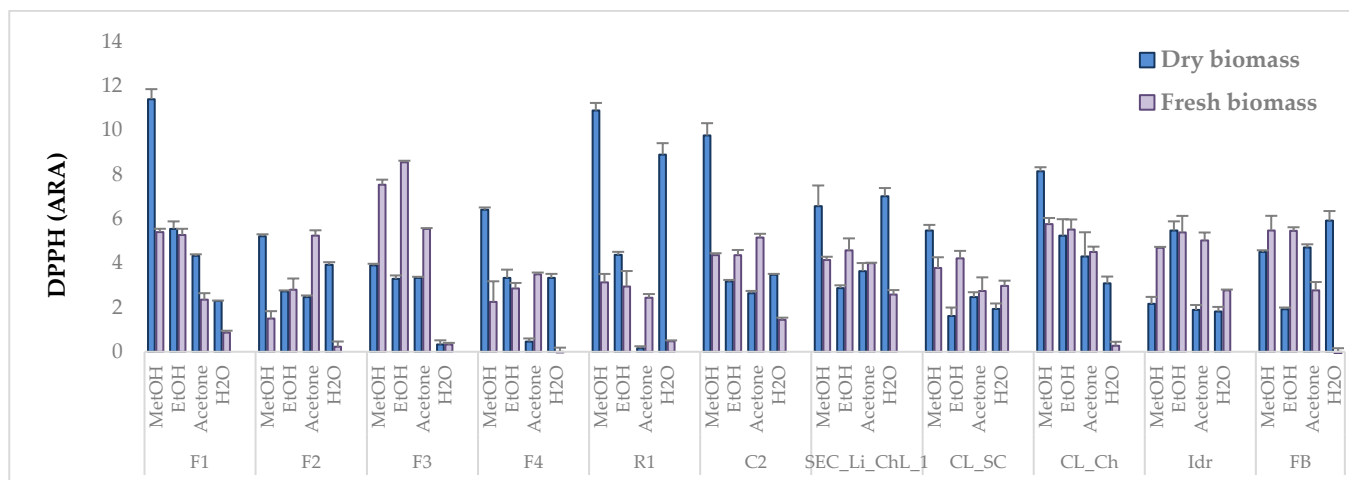

**Figure S2.** The antiradical activity (ARA), expressed as a percentage of DPPH inhibition, of 50  $\mu\text{L}$  extract of dry and fresh microalgal biomass under different types of solvent extraction. Each datum is the mean  $\pm$  SD from three replicates.
